# Supplementary material
Source: publisher site journal article supplement (https://www.dovepress.com/get_supplementary_file.php?f=260537.docx)

**Additional file 1:**

**Fig. S1 The effects of PVT1 overexpression on HCT116 and HT29 cell proliferation.** (A) The expression of PVT1 mRNA was detected using qRT-PCR in HCT116 and HT29 cells transfected with PVT1 or Vector. (B, C) The proliferation of PVT1-overexpressed HCT116 and HT29 cells was detected using MTT assay. **P*<0.05.


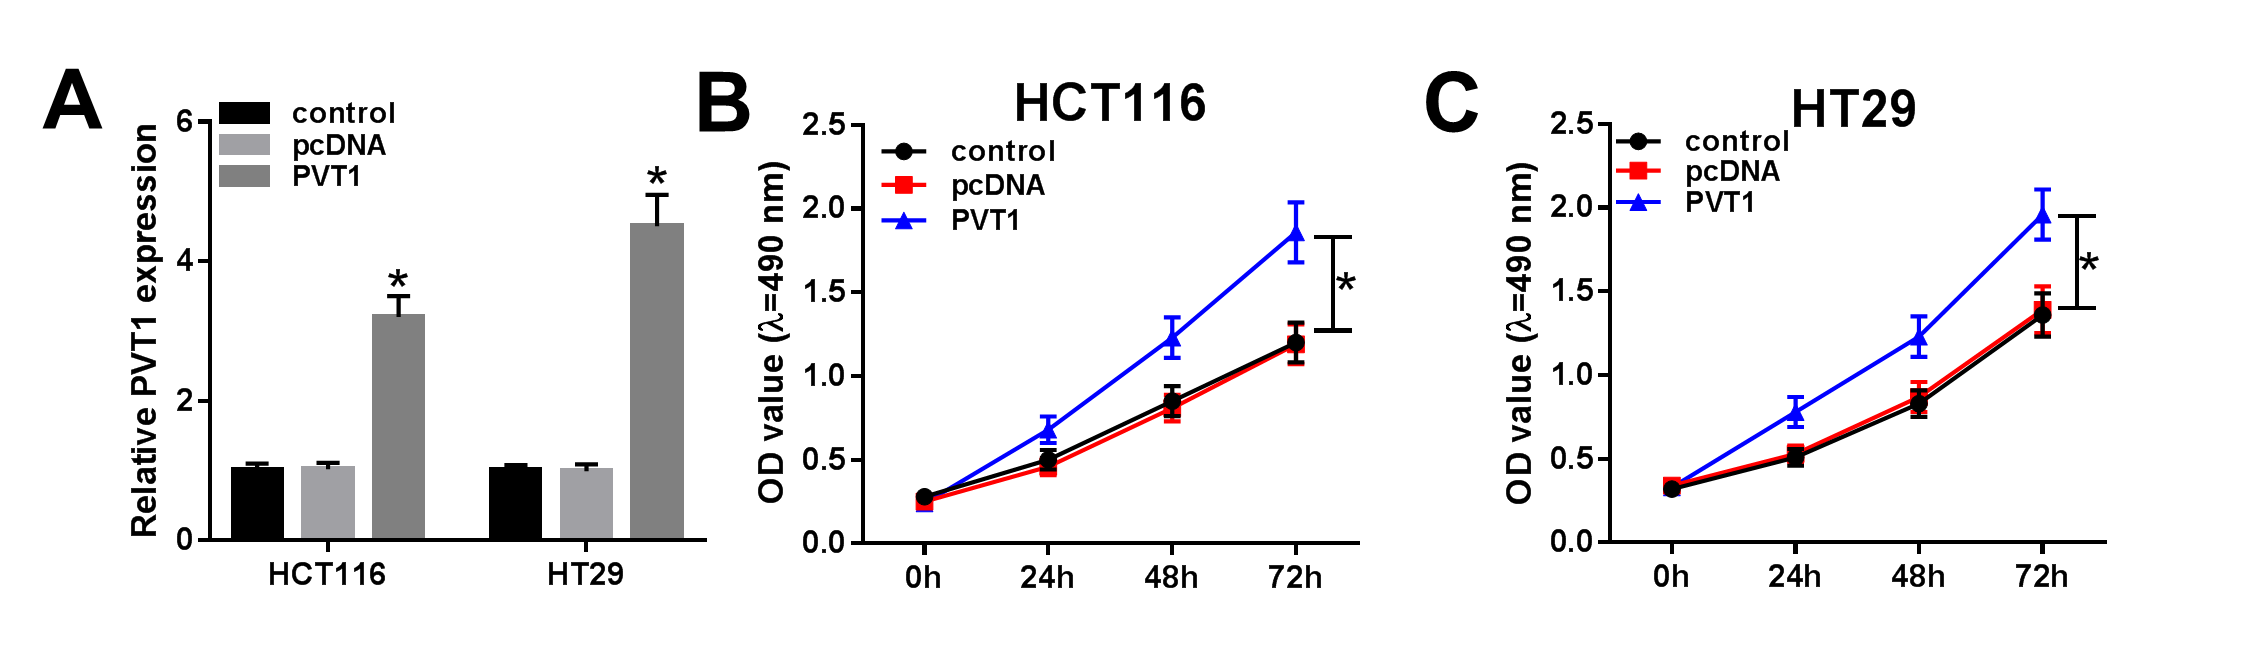


**Fig. S2** (A, B) The images for the migration and invasion of HCT116 and HT29 cells transfected with sh-NC, sh-PVT1, sh-PVT1 + anti-miR-NC or sh-PVT1 + anti-miR-106b-5p.


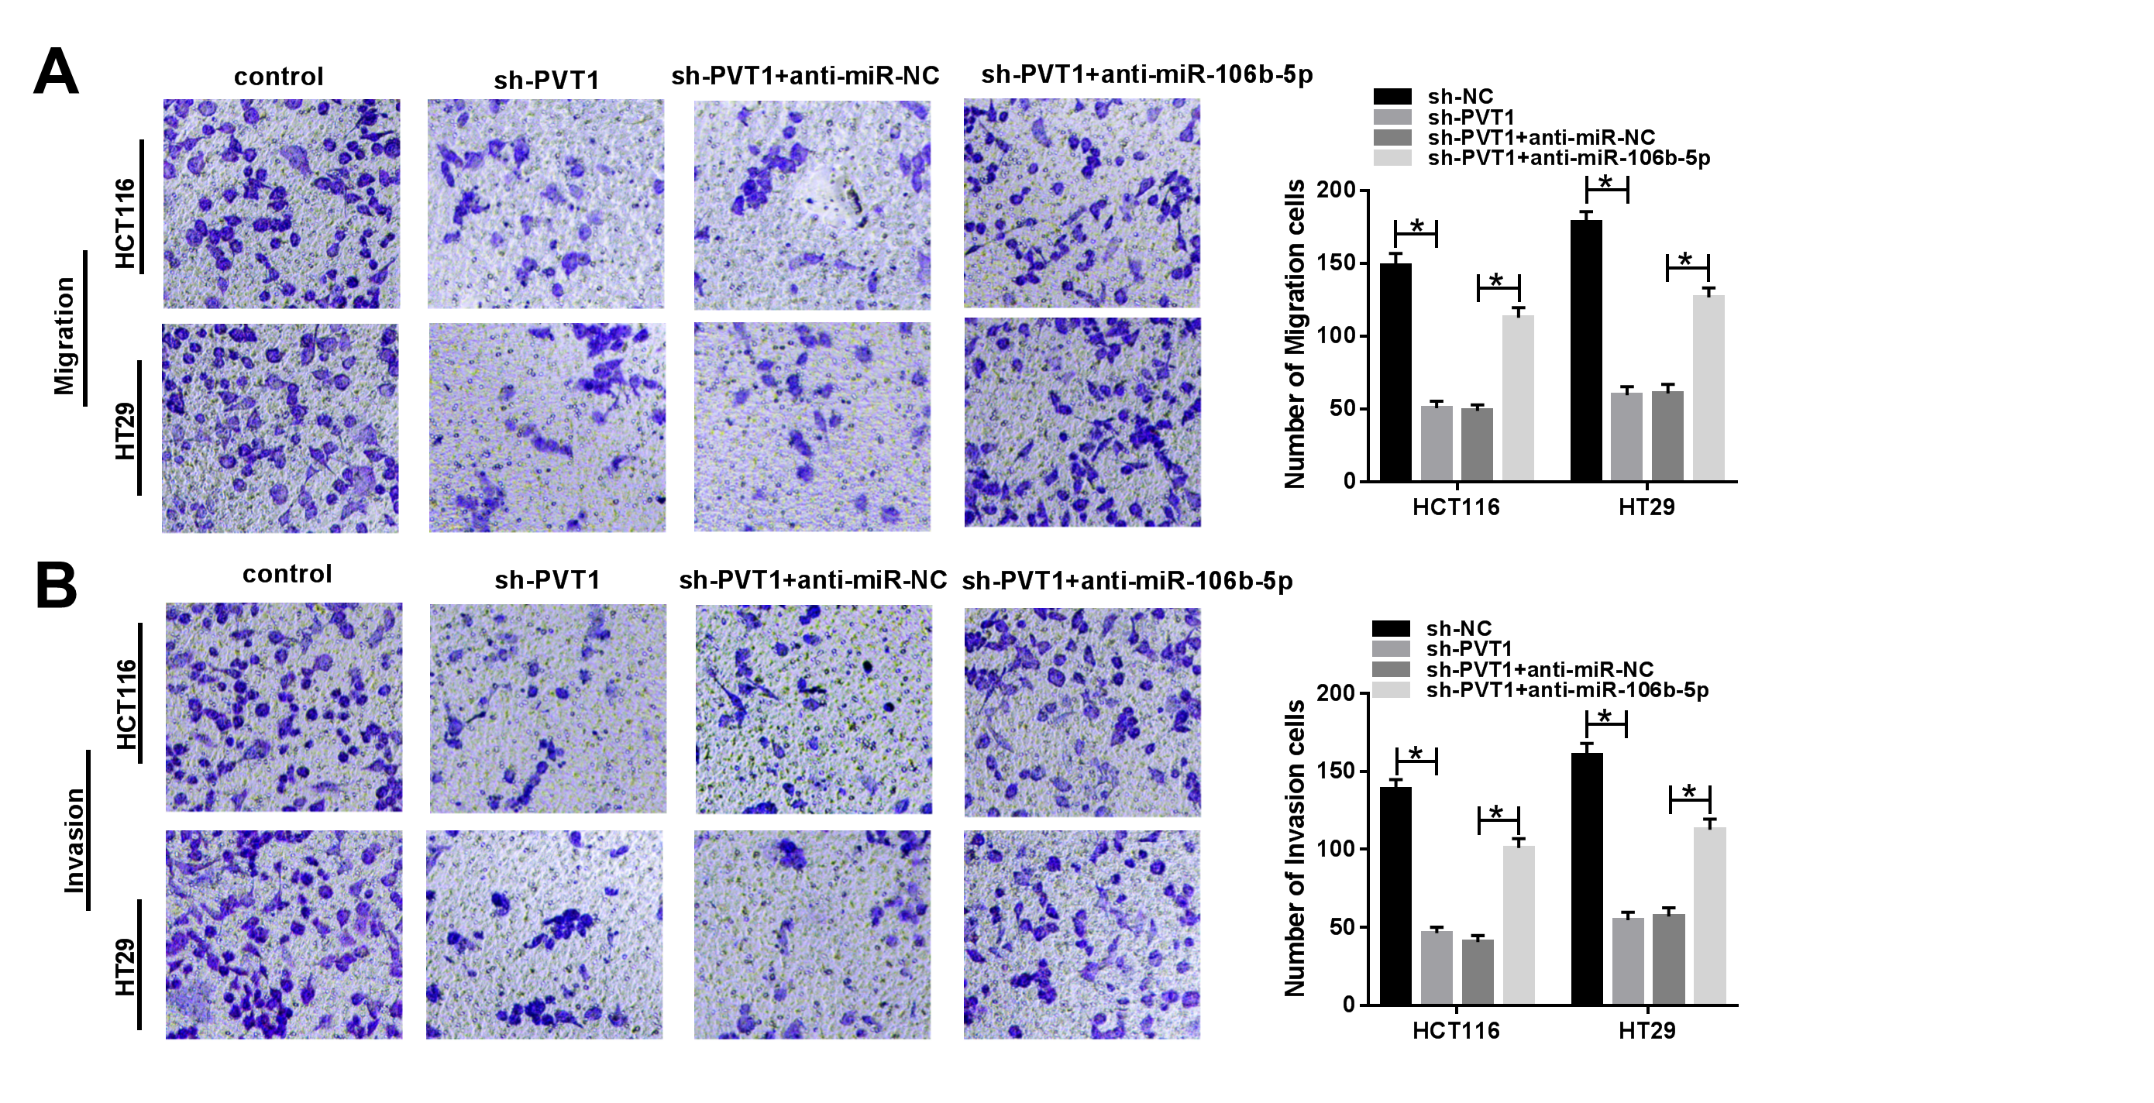


**Fig. S3** (A, B) The images for the migration and invasion of HCT116 and HT29 cells transfected with miR-NC, miR-106b-5p, miR-106b-5p + control vector or miR-106b-5p + FJX1.


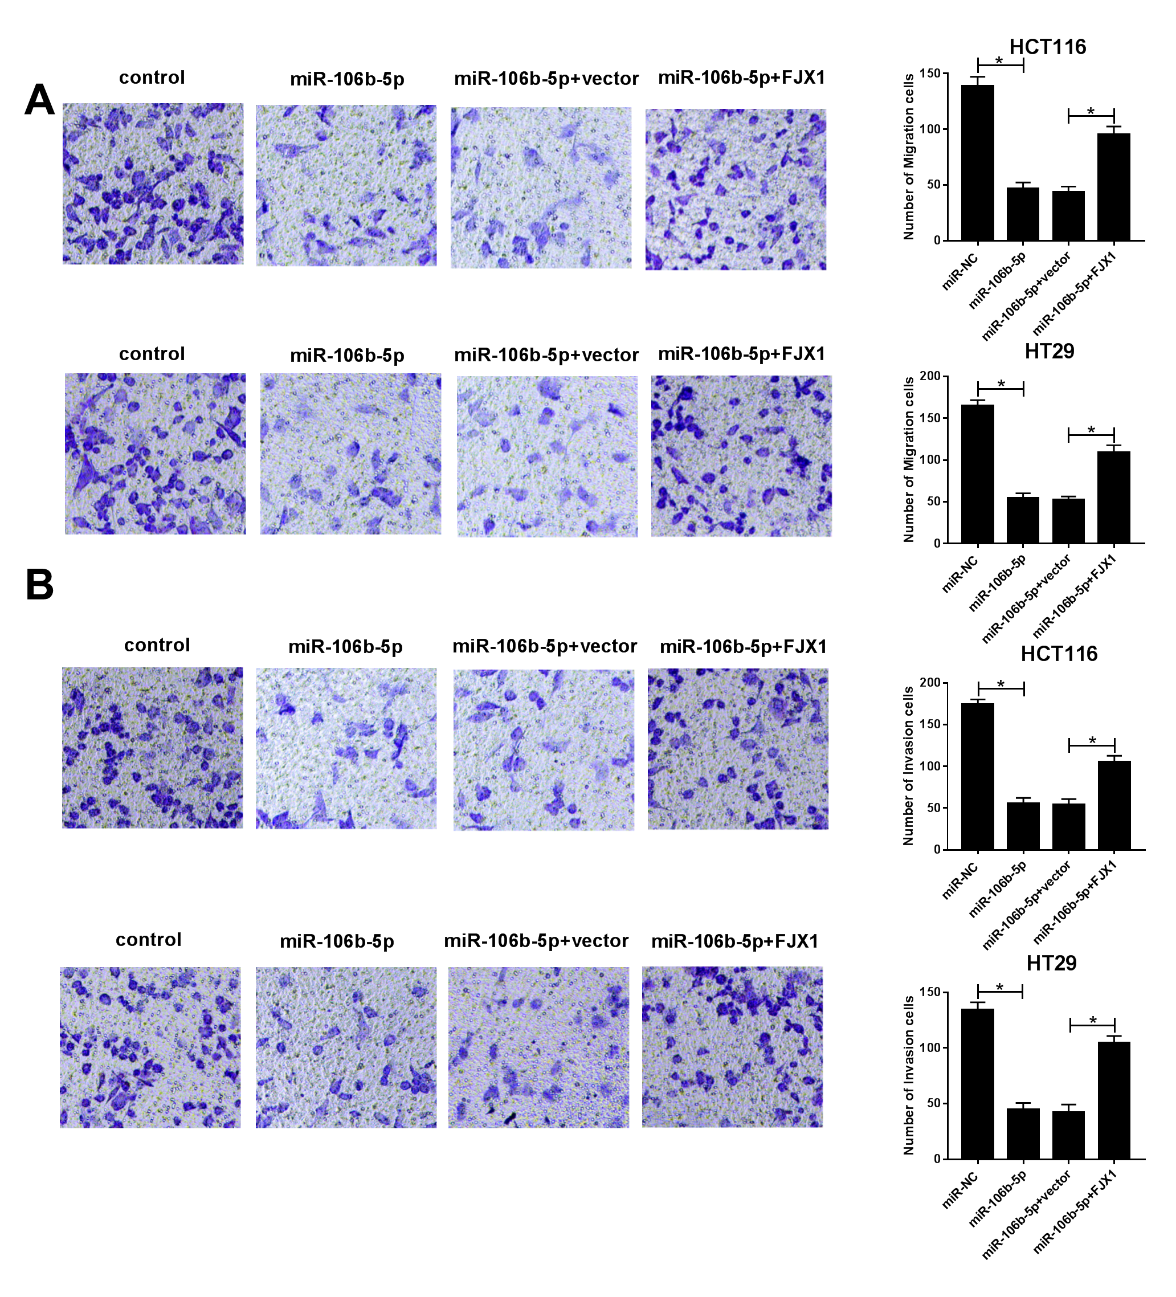

Supplement: Supplementary file 1 [file get_supplementary_file.php]
